# Supplementary material
Source: Royal Society of Chemistry journal article supplement (doi:10.1039/d5nr05292k)
Supplement: d5nr05292k1.pdf [file d5nr05292k1.pdf]

## Electronic Supporting Information

### **Super Electron Transfer Channels Enable Prussian-Blue-Like Nanocarbon Felts for Ultrasensitive Glucose Biosensing Applications**

Taotao Liang,<sup>a</sup> Xiaogang Guo,<sup>\*b</sup> Ran Jin,<sup>c</sup> Molong Chen,<sup>a</sup> Junfeng Guo,<sup>a</sup> Chuyue Tang,<sup>a</sup> Hong Zhao,<sup>b</sup> Xun Cui,<sup>\*c</sup> Yihuang Chen,<sup>\*d</sup> Lin Guo<sup>\*a</sup>

<sup>a</sup>Sports Medicine Center, The First Affiliated Hospital of Army Medical University, Chongqing 400038, China. E-mail: [guolin6212@163.com](mailto:guolin6212@163.com)

<sup>b</sup> College of Chemistry and Chemical Engineering, Yangtze Normal University, Chongqing 408100, China. E-mail: [guoxiaogang0528@126.com](mailto:guoxiaogang0528@126.com)

<sup>c</sup> State Key Laboratory of New Textile Materials and Advanced Processing, Wuhan Textile University, Wuhan 430200, China. E-mail: [xcui@wtu.edu.cn](mailto:xcui@wtu.edu.cn)

<sup>d</sup> College of Chemistry and Materials Engineering, Wenzhou University, Wenzhou 325035, China. E-mail: [yhchen@wzu.edu.cn](mailto:yhchen@wzu.edu.cn)

Figures and Table:

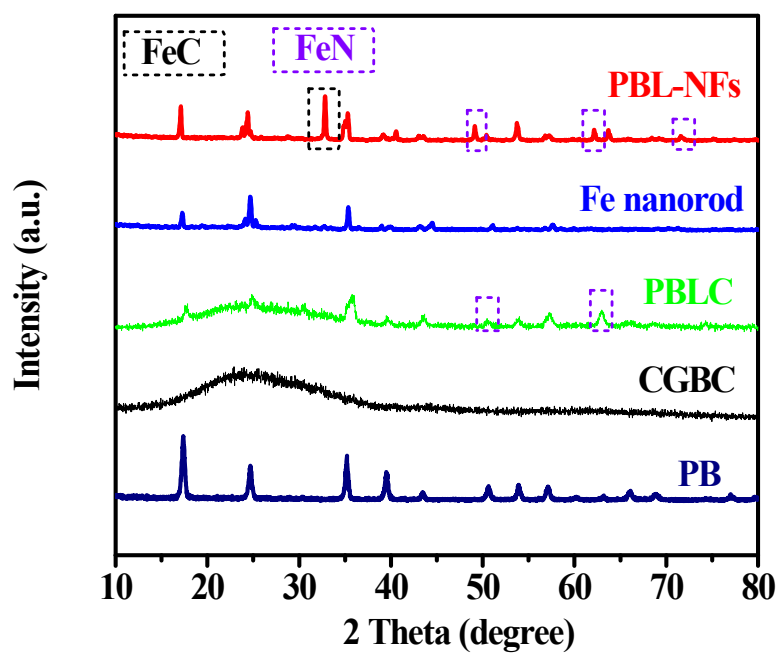

**Figure S1.** Typical X-ray diffraction (XRD) pattern patterns of CGBC (black line), prussian blue (PB, navy line), PBL-C (green line), Fe nanorod (blue line), PBL-NFs (magenta line).

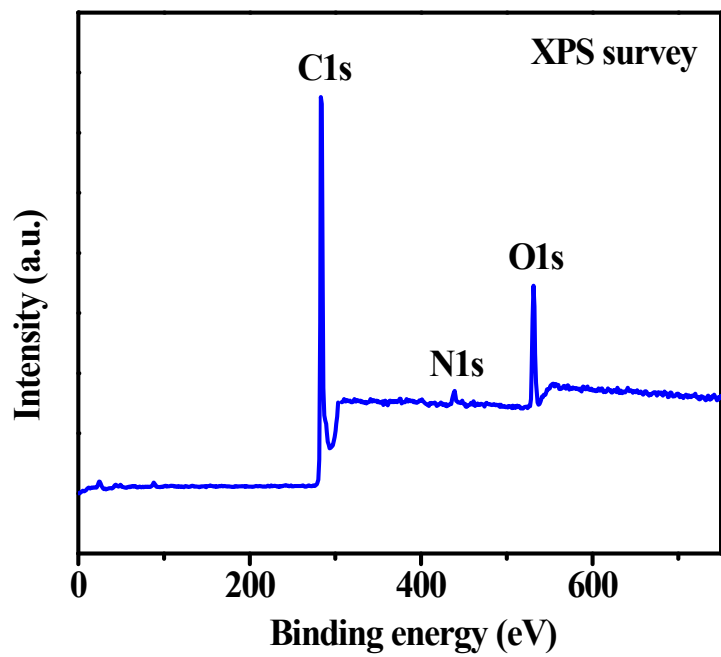

**Figure S2.** XPS survey spectra of as-obtained CGBC.

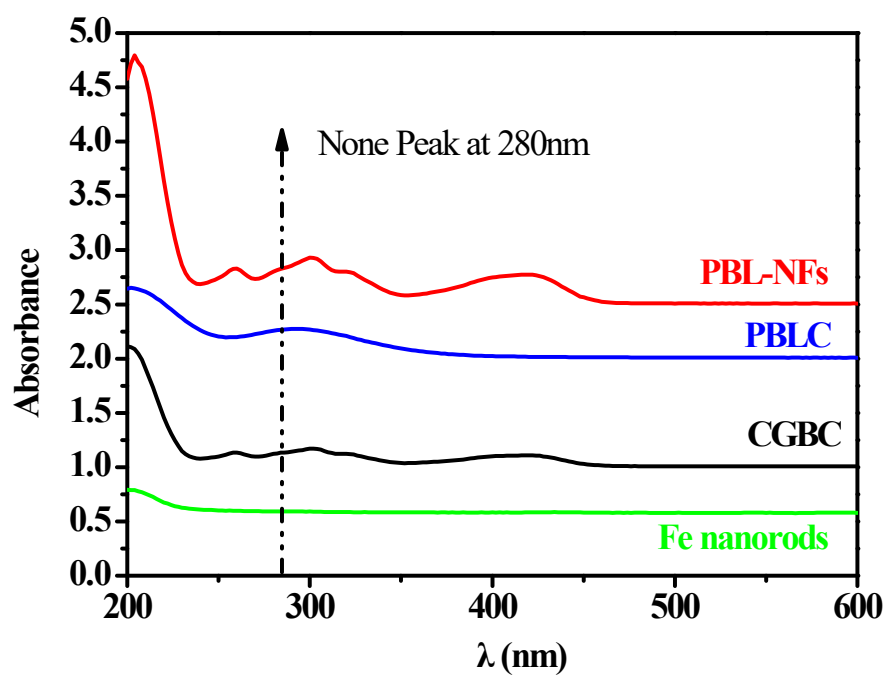

**Figure S3.** The UV-Vis spectrum of materials including Fe nanorods, CGBC, PBL, and PBL-NFs.

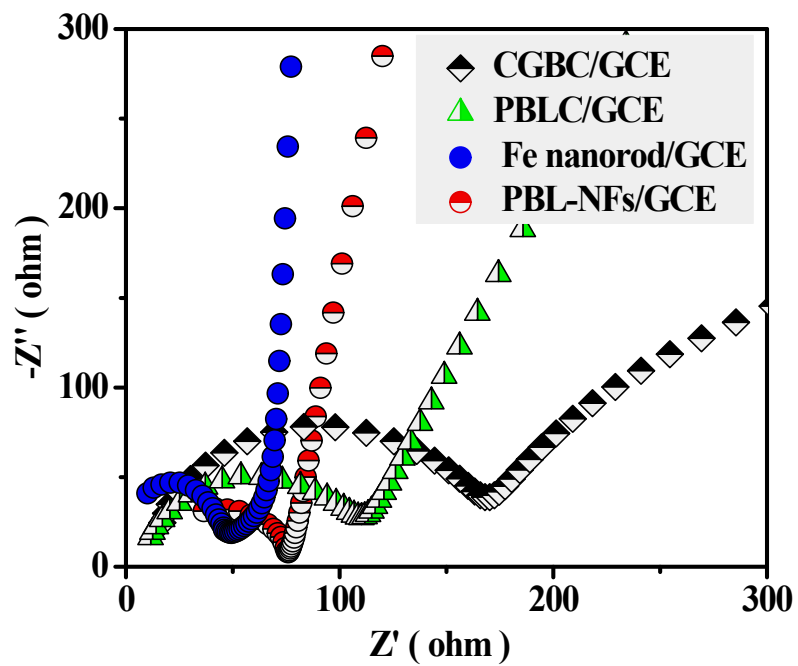

**Figure S4.** EIS measurements of CGBC, Fe nanorods, PBLc and PBL-NFs in 0.01 M PBS at a scan rate of  $50 \text{ mV s}^{-1}$ .

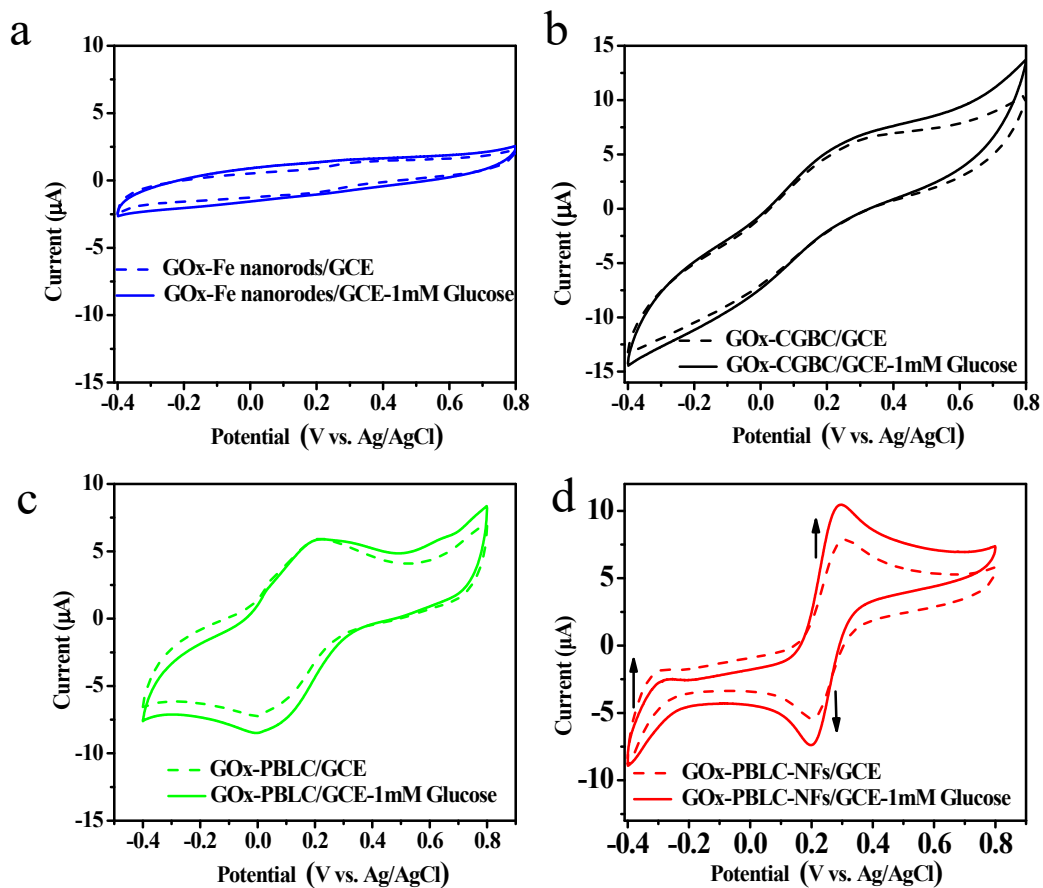

**Figure S5.** CV curves of different enzyme-modified electrodes (dotted line) and their electrochemical response to 1 mM glucose (solid line): (a) GOx-Fe nanorod/GCE, (b) GOx-CGBC/GCE, (c) GOx-PBLC/GC, (d) GOx-PBL-NFs/GCE in 0.01M PBS at a scan rate of  $50 \text{ mV s}^{-1}$ .

**Table S1.** Comparison of the analytical results of glucose sensing in human serum based on the present method and glucometer.

| Sample Category | Sample ID | Determined by glucometer (mM) | Determined by this biosensor (Mean $\pm$ SD, mM) <sup>1</sup> | Recovery <sup>2</sup> (%) | RSD (%) <sup>1</sup> |
|-----------------|-----------|-------------------------------|---------------------------------------------------------------|---------------------------|----------------------|
| Hypoglycemic    | 1         | 1.0                           | 0.92 $\pm$ 0.05                                               | 92.0                      | 5.5                  |
|                 | 2         | 2.5                           | 2.45 $\pm$ 0.14                                               | 98.0                      | 5.8                  |
| Normoglycemic   | 3         | 4.5                           | 4.35 $\pm$ 0.20                                               | 96.7                      | 4.6                  |
|                 | 4         | 6.5                           | 6.26 $\pm$ 0.33                                               | 96.3                      | 5.2                  |
| Hyperglycemic   | 5         | 7.5                           | 7.60 $\pm$ 0.41                                               | 101.3                     | 5.4                  |
|                 | 6         | 9.5                           | 9.32 $\pm$ 0.57                                               | 98.1                      | 6.1                  |

<sup>1</sup> The mean value, standard deviation (SD), and relative standard deviation (RSD) were calculated from three parallel measurements of the same serum sample using the fabricated biosensor.

<sup>2</sup> Recovery (%) = (Mean value obtained by biosensor/Value obtained by glucometer) \*100%.
